# Supplementary material for: The Health-Promoting Quality Attributes, Polyphenols, Iridoids and Antioxidant Activity during the Development and Ripening of Cornelian Cherry (Cornus mas L.)
Source: MDPI journal article supplement (doi:10.3390/antiox13020229), 2024-02-13
Supplement: s1 [file s1]

**Table S1** The changes of color, fruit weight, dry weight, and TSS during the development and ripening of cornelian cherry fruits.

| Stage                   | Color                   | Fruit weight<br>[g] * | Dry weight<br>[%]         | TSS<br>[°Brix]    |
|-------------------------|-------------------------|-----------------------|---------------------------|-------------------|
| Cultivar                |                         | $\bar{x}$             | $mean \pm SD$             | $\bar{x}$         |
| <b>‘Bolestraszycki’</b> |                         |                       |                           |                   |
| S1                      | green                   | 0.90 <sup>v</sup>     | 18.86 ± 0.0 <sup>e</sup>  | 18.5 <sup>a</sup> |
| S2                      | green                   | 1.03 <sup>r</sup>     | 19.15 ± 0.5 <sup>cd</sup> | 16.3 <sup>c</sup> |
| S3                      | green                   | 1.51 <sup>l</sup>     | 16.32 ± 0.4 <sup>h</sup>  | 13.1 <sup>h</sup> |
| S4                      | yellow with light blush | 2.42 <sup>g</sup>     | 15.21 ± 0.8 <sup>i</sup>  | 11.7 <sup>k</sup> |
| S5                      | light red               | 2.78 <sup>e</sup>     | 12.89 ± 0.4 <sup>m</sup>  | 14.7 <sup>p</sup> |
| S6                      | red                     | 3.67 <sup>a</sup>     | 20.77 ± 0.0 <sup>a</sup>  | 19.4 <sup>a</sup> |
| <b>‘Słowianin’</b>      |                         |                       |                           |                   |
| S1                      | green                   | 0.84 <sup>w</sup>     | 17.15 ± 0.4 <sup>g</sup>  | 14.8 <sup>f</sup> |
| S2                      | green                   | 0.93 <sup>u</sup>     | 17.40 ± 0.1 <sup>fg</sup> | 11.8 <sup>j</sup> |
| S3                      | green                   | 1.08 <sup>p</sup>     | 15.72 ± 0.1 <sup>i</sup>  | 11.9 <sup>i</sup> |
| S4                      | green                   | 1.49 <sup>m</sup>     | 14.73 ± 0.1 <sup>j</sup>  | 11.6 <sup>l</sup> |
| S5                      | green/yellow            | 2.26 <sup>h</sup>     | 13.6 ± 0.2 <sup>kl</sup>  | 10.1 <sup>o</sup> |
| S6                      | light red/red           | 2.96 <sup>d</sup>     | 19.63 ± 0.1 <sup>bc</sup> | 16.1 <sup>d</sup> |
| <b>‘Paczoski’</b>       |                         |                       |                           |                   |
| S1                      | green                   | 0.98 <sup>s</sup>     | 15.91 ± 0.2 <sup>hi</sup> | 14.2 <sup>g</sup> |
| S2                      | green                   | 1.03 <sup>r</sup>     | 15.56 ± 0.1 <sup>i</sup>  | 9.1 <sup>s</sup>  |
| S3                      | green                   | 1.48 <sup>n</sup>     | 13.74 ± 0.1 <sup>k</sup>  | 10.8 <sup>n</sup> |
| S4                      | yellow                  | 2.07 <sup>j</sup>     | 12.94 ± 0.0 <sup>m</sup>  | 9.3 <sup>r</sup>  |
| S5                      | yellow with light blush | 2.74 <sup>f</sup>     | 13.04 ± 0.1 <sup>lm</sup> | 9.6 <sup>q</sup>  |
| S6                      | light red/red           | 3.26 <sup>b</sup>     | 17.85 ± 0.1 <sup>f</sup>  | 14.9 <sup>e</sup> |
| <b>‘Florianka’</b>      |                         |                       |                           |                   |
| S1                      | green                   | 0.94 <sup>t</sup>     | 19.21 ± 0.0 <sup>cd</sup> | 19.0 <sup>b</sup> |
| S2                      | green                   | 1.04 <sup>q</sup>     | 19.99 ± 0.1 <sup>b</sup>  | 7.2 <sup>u</sup>  |
| S3                      | green                   | 1.22 <sup>o</sup>     | 19.55 ± 0.3 <sup>bc</sup> | 8.8 <sup>t</sup>  |
| S4                      | green/yellow            | 1.61 <sup>k</sup>     | 18.45 ± 0.2 <sup>e</sup>  | 9.6 <sup>q</sup>  |

|    |               |                   |                          |                   |
|----|---------------|-------------------|--------------------------|-------------------|
| S5 | yellow        | 2.14 <sup>i</sup> | 14.53 ± 0.3 <sup>j</sup> | 11.8 <sup>j</sup> |
| S6 | light red/red | 3.01 <sup>c</sup> | 14.83 ± 0.4 <sup>j</sup> | 11.0 <sup>m</sup> |

Legend: S1-S6 development and ripening stages; \*mean fruit weight, n = 80; TSS, total soluble solids; SD, standard deviation;

**Table S2** UPLC-ESI-qTOF-MS/MS identification of the secondary metabolites in cornelian cherry fruits.

| No.                  | tR<br>(min) | Λmax     | Tentative identification<br>(isomer no.) | MS1 [M – H]–<br>(m/z) | MS2 other ions<br>(m/z)                                                                      |
|----------------------|-------------|----------|------------------------------------------|-----------------------|----------------------------------------------------------------------------------------------|
| HYDROLYSABLE TANNINS |             |          |                                          |                       |                                                                                              |
| 1                    | 1.51        | 277      | Mono-O-galloyl-β-D-glucose (1)           | 331                   | 169, 125                                                                                     |
| 2                    | 1.82        | 271      | Gallic acid                              | 169                   | 125                                                                                          |
| 3                    | 1.78        | 266      | Gemin D (1)                              | 633                   | 301, 275, 249, 169, 125                                                                      |
| 4                    | 2.27        | 256      | Gemin D (2)                              | 633                   | 301, 275, 249, 169, 125                                                                      |
| 5                    | 2.66        | 275      | Di-O-galloyl-β-D-glucose (1)             | 483                   | 331, 169, 125                                                                                |
| 6                    | 2.72        | 219, 262 | Bis-HHDP-hexoside (2)                    | 783                   | 481, 331, 301, 275, 169, 125                                                                 |
| 7                    | 3.03        | 219, 264 | Camptothin A (1)                         | 1417, 708–2           | 1247, 1115, 785, 765, 633, 613, 451, 301, 275, 169, 125                                      |
| 8                    | 3.44        | 219, 264 | Camptothin A (2)                         | 1417, 708–2           | 1247, 1115, 785, 765, 633, 613, 451, 301, 275, 169, 125                                      |
| 9                    | 3.68        | 219, 262 | Bis-HHDP-hexoside (2)                    | 783                   | 633, 481, 301, 275, 249                                                                      |
| 10                   | 3.88        | 219, 262 | Camptothin A (3)                         | 708–2, 1417           | 1247, 935, 785, 765, 633, 613, 451, 301, 275, 249, 169                                       |
| 11                   | 3.91        | 219, 263 | Cornusiin F (1)                          | 2201, 1100–2          | 933, 785, 783, 633, 451, 425, 301, 275, 249, 169, 125                                        |
| 12                   | 4.13        | 219, 263 | Cornusiin F (2)                          | 2201, 1100–2          | 1567, 1247, 933, 785, 765, 633, 613, 451, 483, 301, 249, 169, 125                            |
| 13                   | 4.41        | 219, 269 | Cornusiin A (1)                          | 1569, 784–2           | 1417, 1247, 935, 785, 765, 633, 451, 301, 275, 249, 169, 125                                 |
| 14                   | 4.55        | 219, 262 | Cornusiin F (3)                          | 2201, 1100–2          | 2031, 1569, 1417, 1247, 933, 785, 765, 633, 613, 483, 451, 313, 301, 275, 271, 249, 169, 125 |
| 15                   | 4.75        | 219, 269 | Cornusiin A (2)                          | 1569, 784–2           | 1085, 933, 785, 765, 633, 451, 331, 301, 275, 271, 249, 169, 125                             |
| 16                   | 4.79        | 219, 269 | Cornusiin F (4)                          | 2201, 1100–2          | 1569, 1247, 1015, 933, 785, 765, 665, 633, 613, 451, 483, 451, 301, 275, 249, 169, 125       |
| 17                   | 4.83        | 219, 270 | Tri-O-galloyl-β-D-glucose (1)            | 635                   | 313, 169, 125                                                                                |
| 18                   | 4.94        | 219, 270 | Tellimagrandin I                         | 785                   | 765, 633, 483, 451, 313, 301, 275, 249, 169, 125                                             |
| 19                   | 5.05        | 219, 269 | Cornusiin C (1)                          | 2353, 1176–2          | 2201, 1569, 933, 785, 765, 633, 465, 451, 301, 275, 249, 169, 125                            |
| 20                   | 5.24        | 219, 267 | Cornusiin A (3)                          | 1569, 784–2           | 935, 785, 765, 633, 465, 451, 301, 275, 249, 169, 125                                        |
| 21                   | 5.49        | 219, 269 | Cornusiin A (4)                          | 1569, 784–2           | 1249, 935, 785, 765, 633, 613, 483, 451, 331, 313, 301, 275, 249, 169, 125                   |
| 22                   | 5.57        | 219, 270 | Cornusiin C (2)                          | 2353, 1176–2          | 1569, 1247/1249, 933, 785, 765, 633, 451, 301, 275, 249, 169, 125                            |

|                |      |          |                                              |                    |                                                                      |
|----------------|------|----------|----------------------------------------------|--------------------|----------------------------------------------------------------------|
| 23             | 5.65 | 219, 269 | Cornusiin C (3)                              | 2353, 1176–2       | 1569, 1417, 935, 785, 768, 633, 451, 331, 301, 275, 249, 169, 125    |
| 24             | 5.72 | 219, 267 | Cornusiin A (5)                              | 1569, 784–2        | 935, 785, 765, 633, 483, 451, 425, 301, 275, 169, 125                |
| 25             | 5.87 | 219, 279 | Corn D or Cmpt B (1)                         | 1721, 860–2        | 1569, 1417, 935, 785, 633, 301, 275, 249, 169, 125                   |
| 26             | 5.94 | 219, 279 | Corn D or Cmpt B (2)                         | 1721, 860–2        | 1569, 1417, 937, 785, 765, 633, 451, 301, 275, 249, 169, 125         |
| 27             | 6.22 | 219, 269 | Cornusiin A (6)                              | 1569, 784–2        | 141, 935, 785, 765, 633, 483, 451, 425, 331, 301, 275, 249, 169, 125 |
| 28             | 6.38 | 219, 269 | Cornusiin C (4)                              | 2353, 1176–2       | 1569, 1417, 937, 785, 633, 613, 451, 301, 275, 249, 169, 125         |
| 29             | 6.47 | 254, 360 | Ellagic acid                                 | 301                | 275, 249                                                             |
| 30             | 6.49 | 219, 250 | Trapanin A ( $\alpha$ or $\beta$ )           | 1252–2             | 1176, 935, 785, 765, 613, 451, 313, 301, 275, 169, 125               |
| 31             | 6.62 | 219, 271 | Tetra- <i>O</i> -galloyl- $\beta$ -D-glucose | 787                | 617, 483, 465, 331, 313, 169, 125                                    |
| IRIDOIDS       |      |          |                                              |                    |                                                                      |
| 32             | 3.88 | 238      | Loganic acid                                 | 2M 751, 375        | 213, 169, 151                                                        |
| 33             | 6.12 | 238      | Loganin                                      | 389 (-) or 435 (+) | 227, 209                                                             |
| 34             | 8.05 | 238      | Cornuside                                    | 2M 1083, 541       | 169, 125                                                             |
| ANTHOCYANINS   |      |          |                                              |                    |                                                                      |
| 35             | 4.34 | 240, 515 | Cyanidin 3- <i>O</i> -galactoside            | 449                | 287                                                                  |
| 36             | 4.51 | 242, 517 | Cyanidin 3- <i>O</i> -robinobioside          | 595                | 287                                                                  |
| 37             | 4.71 | 271, 501 | Pelargonidin 3- <i>O</i> -galactoside        | 433                | 271                                                                  |
| 38             | 4.99 | 271, 501 | Pelargonidin 3- <i>O</i> -robinobioside      | 579                | 271                                                                  |
| FLAVONOLS      |      |          |                                              |                    |                                                                      |
| 39             | 6.86 | 352      | Quercetin-3- <i>O</i> -glucuronide           | 477                | 301, 178, 151                                                        |
| PHENOLIC ACIDS |      |          |                                              |                    |                                                                      |
| 40             | 3.26 | 326      | <i>trans</i> -caftaric acid isomer           | 311                | 179, 149                                                             |
| 41             | 3.57 | 289      | <i>p</i> -coumaric acid derivative           | 341                | 211, 195, 163                                                        |
| 42             | 4.10 | 326      | <i>cis</i> -caftaric acid isomer             | 311                | 179, 149                                                             |
| 43             | 5.03 | 311      | <i>trans</i> -coutaric acid                  | 295                | 163, 149                                                             |
| 44             | 5.07 | 310      | <i>p</i> -coumaric acid                      | 163                | 149                                                                  |
| 45             | 5.53 | 311      | <i>cis</i> -coutaric acid                    | 295                | 163, 149                                                             |

Abbreviations: tR, retention time; MS1, the first mass spectrum (pseudomolecular ions); MS2, the second mass spectrum (fragment ions), HHDP, hexahydroxydiphenoyl. Main signals are underlined;

**Table S3** HPLC-PDA quantification of the secondary metabolites and antioxidant capacity during the development and ripening of cornelian cherry fruits.

| PHENOLIC COMPOUNDS |       |                                 |                                       |                               |                            | IRIDOIDS               | SECONDARY METABOLITES     | ANTIOXIDANT CAPACITY |                         |                         |
|--------------------|-------|---------------------------------|---------------------------------------|-------------------------------|----------------------------|------------------------|---------------------------|----------------------|-------------------------|-------------------------|
|                    |       | Phenolic acids<br>[mg/100 g dw] | Hydrolysable tannins<br>[mg/100 g dw] | Anthocyanins<br>[mg/100 g dw] | Flavonols<br>[mg/100 g dw] | TOTAL<br>[mg/100 g dw] | Iridoids<br>[mg/100 g dw] | TSM<br>[mg/100 g dw] | ABTS<br>[mM TE/100g dw] | FRAP<br>[mM TE/100g dw] |
| Cultivar           | Stage | mean                            | mean                                  | mean                          | mean                       | mean                   | mean                      | mean                 | mean ± SD               | mean ± SD               |
| ‘Bolestraszycki’   | S1    | 2587.36 c                       | 1661.23 a                             |                               | 63.89 a                    | 4312.47 b              | 2058.45 e                 | 6370.92 b            | 102.12 ± 1.17 b         | 97.76 ± 0.85 a          |
|                    | S2    | 1906.50 e                       | 1532.19 b                             |                               | 61.79 a                    | 3513.68 e              | 2109.34 e                 | 5609.83 d            | 105.54 ± 2.74 b         | 71.61 ± 5.18 bc         |
|                    | S3    | 1184.11 h                       | 1054.42 d                             | 0.00                          | 42.25 b                    | 2283.78 i              | 1717.21 gh                | 4000.99 h            | 74.11 ± 2.60 ef         | 61.33 ± 1.39 d          |
|                    | S4    | 574.65 k                        | 507.73 l                              |                               | 23.15 c                    | 1105.54 lm             | 1238.16 jk                | 2343.69 k            | 64.14 ± 0.64 i          | 26.35 ± 0.16 g          |
|                    | S5    | 572.02 k                        | 340.78 no                             |                               | 15.11 ef                   | 927.91 mn              | 1688.51 h                 | 2616.42 lm           | 25.70 ± 0.83 kl         | 22.31 ± 1.92 gh         |
|                    | S6    | 547.10 k                        | 312.50 op                             | 143.17 a                      | 11.43 fg                   | 1017.74 n              | 960.38 m                  | 1974.59 n            | 9.78 ± 0.19 n           | 13.44 ± 0.35 i          |
| % P S1             |       | 60.0%                           | 38.5%                                 | 0.0%                          | 1.5%                       | 100%                   | -                         | -                    | -                       | -                       |
| % P S6             |       | 53.8%                           | 31.3%                                 | 14.1%                         | 1.1%                       | 100%                   | -                         | -                    | -                       | -                       |
| % TSM S1           |       | 40.6%                           | 26.1%                                 | 0.0%                          | 1.0%                       | -                      | 32.3%                     | 100%                 | -                       | -                       |
| % TSM S6           |       | 27.7%                           | 15.8%                                 | 7.3%                          | 0.6%                       | -                      | 48.6%                     | 100%                 | -                       | -                       |
| ‘Słowianin’        | S1    | 3561.64 a                       | 1210.60 c                             |                               | 17.55 de                   | 4789.78 a              | 1989.84 f                 | 6779.62 a            | 76.31 ± 4.51 e          | 63.00 ± 4.57 d          |
|                    | S2    | 3045.89 b                       | 995.21 e                              |                               | 12.83 fg                   | 4053.93 c              | 2282.50 d                 | 6336.43 b            | 72.71 ± 0.40 efg        | 76.38 ± 0.21 b          |
|                    | S3    | 2478.09 c                       | 774.74 h                              | 0.00                          | 12.13 fg                   | 3264.96 f              | 2112.15 e                 | 5377.11 e            | 68.40 ± 2.03 hg         | 69.44 ± 1.24 c          |
|                    | S4    | 1520.18 f                       | 713.01 i                              |                               | 8.59 gh                    | 2241.78 i              | 1692.42 h                 | 3934.19 hi           | 69.23 ± 0.25 fg         | 46.36 ± 0.03 e          |
|                    | S5    | 947.99 i                        | 289.85 p                              |                               | 4.12 i                     | 1241.96 kl             | 1291.87 j                 | 2533.82 kl           | 23.78 ± 0.38 lm         | 20.35 ± 0.25 h          |
|                    | S6    | 403.40 l                        | 233.92 r                              | 42.94 c                       | 2.27 i                     | 682.03 o               | 721.15 n                  | 1403.67 p            | 20.21 ± 0.81 m          | 13.09 ± 1.47 i          |
| % P S1             |       | 74.4%                           | 25.3%                                 | 0.0%                          | 0.4%                       | 100%                   | -                         | -                    | -                       | -                       |
| % P S6             |       | 59.1%                           | 34.3%                                 | 6.2%                          | 0.3%                       | 100%                   | -                         | -                    | -                       | -                       |
| % TSM S1           |       | 52.5%                           | 17.9%                                 | 0.0%                          | 0.3%                       | -                      | 29.4%                     | 100%                 | -                       | -                       |
| % TSM S6           |       | 28.7%                           | 16.7%                                 | 3.06%                         | 0.2%                       | -                      | 51.4%                     | 100%                 | -                       | -                       |
| ‘Paczoski’         | S1    | 2185.29 d                       | 948.20 f                              |                               | 21.85 cd                   | 3155.34 f              | 2709.88 b                 | 5865.22 c            | 92.94 ± 3.52 c          | 74.05 ± 5.53 bc         |
|                    | S2    | 1877.67 e                       | 887.40 g                              |                               | 19.61 cd                   | 2784.69 h              | 3093.37 a                 | 5878.05 c            | 110.73 ± 1.24 a         | 77.21 ± 5.04 b          |
|                    | S3    | 1336.20 g                       | 572.92 k                              | 0.00                          | 11.60 fg                   | 1920.72 j              | 3108.56 a                 | 5029.29 f            | 101.42 ± 1.85 b         | 59.62 ± 1.15 d          |
|                    | S4    | 948.68 i                        | 407.20 m                              |                               | 12.99 f                    | 1368.87 k              | 2535.96 c                 | 3904.82 hi           | 42.26 ± 0.30 j          | 35.37 ± 0.57 f          |
|                    | S5    | 603.54 jk                       | 146.29 pq                             |                               | 6.02 hi                    | 893.02 n               | 2073.75 e                 | 2829.60 j            | 29.45 ± 0.00 k          | 17.25 ± 0.13 hi         |
|                    | S6    | 285.37 l                        | 194.29 s                              | 67.41 b                       | 3.42 i                     | 550.50 o               | 1126.19 l                 | 1676.69 o            | 18.54 ± 0.26 n          | 5.32 ± 0.23 j           |
| % P S1             |       | 69.3%                           | 30.1%                                 | 0.0%                          | 0.7%                       | 100%                   | -                         | -                    | -                       | -                       |
| % P S6             |       | 51.8%                           | 35.3%                                 | 12.2%                         | 0.6%                       | 100%                   | -                         | -                    | -                       | -                       |
| % TSM S1           |       | 37.3%                           | 16.2%                                 | 0.0%                          | 0.4%                       | -                      | 46.2%                     | 100%                 | -                       | -                       |
| % TSM S6           |       | 17.0%                           | 11.6%                                 | 4.0%                          | 0.2%                       | -                      | 67.2%                     | 100%                 | -                       | -                       |
| ‘Florianka’        | S1    | 2937.17 b                       | 869.49 g                              |                               | 23.46 c                    | 3830.13 d              | 1758.94 gh                | 5589.07 d            | 76.54 ± 2.88 e          | 62.76 ± 0.10 d          |
|                    | S2    | 2554.32 c                       | 934.15 f                              |                               | 18.04 de                   | 3506.51 e              | 1780.09 g                 | 5286.60 e            | 86.51 ± 7.09 d          | 75.18 ± 3.23 bc         |
|                    | S3    | 2187.18 d                       | 782.35 h                              | 0.00                          | 19.96 cd                   | 2989.50 g              | 1740.69 gh                | 4730.19 g            | 82.28 ± 0.26 d          | 70.44 ± 0.54 c          |
|                    | S4    | 1556.10 f                       | 651.32 j                              |                               | 18.34 de                   | 2225.76 i              | 1535.28 i                 | 3761.03 i            | 77.49 ± 0.01 e          | 58.38 ± 4.46 d          |
|                    | S5    | 712.40 j                        | 247.27 qr                             |                               | 12.51 fg                   | 972.18 mn              | 1209.37 k                 | 2181.55 m            | 63.73 ± 1.27 hi         | 35.71 ± 2.48 f          |
|                    | S6    | 552.19 k                        | 376.11 mn                             | 30.83 d                       | 6.41 hi                    | 966.33 mn              | 910.17 m                  | 1876.50 n            | 42.40 ± 2.07 j          | 31.73 ± 2.32 f          |
| % P S1             |       | 76.7%                           | 22.7%                                 | 0.0%                          | 0.6%                       | 100%                   | -                         | -                    | -                       | -                       |
| % P S6             |       | 57.2%                           | 38.9%                                 | 3.2%                          | 0.7%                       | 100%                   | -                         | -                    | -                       | -                       |
| % TSM S1           |       | 52.6%                           | 15.6%                                 | 0.0%                          | 0.4%                       | -                      | 31.5%                     | 100%                 | -                       | -                       |
| % TSM S6           |       | 29.5%                           | 20.0%                                 | 1.6%                          | 0.3%                       | -                      | 48.5%                     | 100%                 | -                       | -                       |

The results are expressed as mean (sums), and mean  $\pm$  standard deviation (SD),  $n = 3$ . **Legend:** TSM, total secondary metabolites; S1-S6. subsequent sampling stages; % P S1, % P S6, percentage of individual group of compounds within polyphenols at the stages S1 and S6; % TSM S1, % TSM S6, percentage of individual group of compounds within total secondary metabolites at the stages S1 and S6;

**Table S4** HPLC-PDA quantification [mg/100 g dw] of the individual polyphenols during the development and ripening of cornelian cherry fruit.

|                  |    | PHENOLIC ACIDS                 |                                  |                                 |                                  |                      |                                 | ANTHOCYANINS       |                    |                    |                    | FLAVONOLS           |
|------------------|----|--------------------------------|----------------------------------|---------------------------------|----------------------------------|----------------------|---------------------------------|--------------------|--------------------|--------------------|--------------------|---------------------|
|                  |    | <i>p</i> -coumaric acid deriv. | Caftaric acid I ( <i>trans</i> ) | Caftaric acid II ( <i>cis</i> ) | Coutaric acid I ( <i>trans</i> ) | Coumaric acid        | Coutaric acid II ( <i>cis</i> ) | Cy-3-gal           | Cy-3-rob           | Pg-3-gal           | Pg-3-rob           | Q-3-glucur          |
| Cultivar         |    | mean $\pm$ SD                  | mean $\pm$ SD                    | mean $\pm$ SD                   | mean $\pm$ SD                    | mean $\pm$ SD        | mean $\pm$ SD                   | mean $\pm$ SD      | mean $\pm$ SD      | mean $\pm$ SD      | mean $\pm$ SD      | mean $\pm$ SD       |
| 'Bolestraszycki' | S1 | 6.18 $\pm$ 0.15 a              | 524.58 $\pm$ 12.34 a             | 974.51 $\pm$ 1.60 f             | 120.36 $\pm$ 1.91 d              | 4.09 $\pm$ 0.01 ab   | 957.63 $\pm$ 5.32 a             |                    |                    |                    |                    | 63.89 $\pm$ 3.27 a  |
|                  | S2 | 7.01 $\pm$ 0.30 b              | 422.42 $\pm$ 15.59 c             | 740.24 $\pm$ 20.93 h            | 97.57 $\pm$ 4.46 e               | 3.14 $\pm$ 0.01 de   | 636.13 $\pm$ 5.55 d             |                    |                    |                    |                    | 61.79 $\pm$ 6.02 a  |
|                  | S3 | 5.64 $\pm$ 0.06 c              | 289.06 $\pm$ 2.19 f              | 452.24 $\pm$ 10.23 i            | 71.32 $\pm$ 0.36 g               | 2.12 $\pm$ 0.19 ghi  | 363.73 $\pm$ 0.20 j             | 0.00               | 0.00               | 0.00               | 0.00               | 42.25 $\pm$ 0.41 b  |
|                  | S4 | 3.33 $\pm$ 0.04 hi             | 148.63 $\pm$ 3.67 hi             | 216.08 $\pm$ 6.41 k             | 32.16 $\pm$ 2.01 k               | 1.55 $\pm$ 0.03jklm  | 172.91 $\pm$ 3.25 o             |                    |                    |                    |                    | 23.15 $\pm$ 0.69 c  |
|                  | S5 | 2.97 $\pm$ 0.23 ijk            | 134.46 $\pm$ 8.04 i              | 215.63 $\pm$ 12.99 k            | 22.74 $\pm$ 1.66 klm             | 1.96 $\pm$ 0.28 hijk | 194.26 $\pm$ 11.55 n            |                    |                    |                    |                    | 15.11 $\pm$ 0.37 ef |
|                  | S6 | 3.15 $\pm$ 0.08 ij             | 201.19 $\pm$ 2.54 g              | 276.49 $\pm$ 4.14 jk            | 12.80 $\pm$ 0.08 no              | 0.35 $\pm$ 0.03 o    | 53.12 $\pm$ 0.03 r              | 15.39 $\pm$ 0.17 b | 18.40 $\pm$ 0.20 a | 74.29 $\pm$ 0.82 a | 35.10 $\pm$ 0.39 a | 11.43 $\pm$ 0.11 fg |
| % S1             |    | 0.2%                           | 20.3%                            | 37.7%                           | 4.7%                             | 0.2%                 | 37%                             | -                  | -                  | -                  | -                  | 100%                |
| % S6             |    | 0.6%                           | 36.8%                            | 50.5%                           | 2.3%                             | 0.1%                 | 9.7%                            | 10.7%              | 12.9%              | 51.9%              | 24.5%              | 100%                |
| 'Słowianin'      | S1 | 4.22 $\pm$ 0.08 ef             | 457.31 $\pm$ 6.09 b              | 2431.67 $\pm$ 61.49 a           | 61.22 $\pm$ 1.29 h               | 3.45 $\pm$ 0.11 cd   | 603.77 $\pm$ 18.53 e            |                    |                    |                    |                    | 17.55 $\pm$ 1.26 ed |
|                  | S2 | 3.63 $\pm$ 0.26 gh             | 402.34 $\pm$ 6.44 cd             | 2081.32 $\pm$ 65.05 b           | 52.27 $\pm$ 1.14 i               | 2.77 $\pm$ 0.81 ef   | 503.57 $\pm$ 4.39 g             |                    |                    |                    |                    | 12.83 $\pm$ 0.50 fg |
|                  | S3 | 4.63 $\pm$ 0.07 d              | 336.97 $\pm$ 2.33 e              | 1700.36 $\pm$ 1.08 d            | 41.75 $\pm$ 0.31 j               | 2.54 $\pm$ 0.05 fg   | 391.82 $\pm$ 1.50 i             | 0.00               | 0.00               | 0.00               | 0.00               | 12.13 $\pm$ 0.47 fg |
|                  | S4 | 3.95 $\pm$ 0.23 fg             | 221.23 $\pm$ 22.05 g             | 1034.34 $\pm$ 33.45 f           | 30.82 $\pm$ 0.98 k               | 1.72 $\pm$ 0.14 ijk  | 228.11 $\pm$ 1.50 m             |                    |                    |                    |                    | 8.59 $\pm$ 0.09 gh  |
|                  | S5 | 3.33 $\pm$ 0.33 hi             | 128.57 $\pm$ 5.90 i              | 667.59 $\pm$ 55.53 h            | 16.91 $\pm$ 2.04 mno             | 1.45 $\pm$ 0.13 klm  | 130.14 $\pm$ 15.26 p            |                    |                    |                    |                    | 4.12 $\pm$ 0.17 i   |
|                  | S6 | 2.92 $\pm$ 0.01 jk             | 60.91 $\pm$ 1.34 j               | 278.69 $\pm$ 22.78 jk           | 11.11 $\pm$ 0.59 o               | 0.45 $\pm$ 0.03 o    | 49.32 $\pm$ 2.28 r              | 15.99 $\pm$ 0.33 b | 1.91 $\pm$ 0.08 b  | 23.27 $\pm$ 1.17 c | 1.76 $\pm$ 0.06 c  | 2.27 $\pm$ 0.04 i   |
| % S1             |    | 0.1%                           | 12.8%                            | 68.3%                           | 1.7%                             | 0.1%                 | 17.0%                           | -                  | -                  | -                  | -                  | 100%                |
| % S6             |    | 0.7%                           | 15.1%                            | 69.1%                           | 2.8%                             | 0.1%                 | 12.2%                           | 37.2%              | 4.4%               | 54.2%              | 4.1%               | 100%                |
| 'Paczoski'       | S1 | 4.50 $\pm$ 0.26 de             | 324.82 $\pm$ 13.82 e             | 852.09 $\pm$ 7.35 g             | 81.52 $\pm$ 2.36 f               | 4.47 $\pm$ 0.54 a    | 917.89 $\pm$ 1.66 b             |                    |                    |                    |                    | 21.85 $\pm$ 0.77 c  |
|                  | S2 | 4.77 $\pm$ 0.46 d              | 297.23 $\pm$ 23.37 f             | 740.06 $\pm$ 6.10 h             | 61.85 $\pm$ 0.67 h               | 3.81 $\pm$ 0.17 ab   | 769.96 $\pm$ 16.70 c            |                    |                    |                    |                    | 19.61 $\pm$ 2.78 ed |
|                  | S3 | 5.72 $\pm$ 0.01 c              | 219.73 $\pm$ 0.86 g              | 487.50 $\pm$ 0.85 i             | 41.21 $\pm$ 0.17 j               | 3.34 $\pm$ 0.23 cd   | 578.69 $\pm$ 8.45 f             | 0.00               | 0.00               | 0.00               | 0.00               | 11.60 $\pm$ 0.71 fg |
|                  | S4 | 6.01 $\pm$ 0.14 bc             | 169.51 $\pm$ 6.57 h              | 357.49 $\pm$ 15.76 j            | 29.42 $\pm$ 0.14 kl              | 2.38 $\pm$ 0.32 fgh  | 383.87 $\pm$ 4.03 i             |                    |                    |                    |                    | 12.99 $\pm$ 0.22 f  |
|                  | S5 | 3.86 $\pm$ 0.02 fg             | 127.94 $\pm$ 1.07 i              | 217.07 $\pm$ 2.42 k             | 21.26 $\pm$ 0.05 lmn             | 2.32 $\pm$ 0.06 fgh  | 231.10 $\pm$ 4.40 m             |                    |                    |                    |                    | 6.02 $\pm$ 0.16 fg  |
|                  | S6 | 2.71 $\pm$ 0.04 kl             | 69.13 $\pm$ 12.74 j              | 102.72 $\pm$ 10.25 l            | 15.91 $\pm$ 1.20 mno             | 1.10 $\pm$ 0.23 mn   | 93.81 $\pm$ 2.89 q              | 20.34 $\pm$ 2.47 a | 0.54 $\pm$ 0.04 d  | 45.18 $\pm$ 4.68 b | 1.36 $\pm$ 0.19 d  | 3.42 $\pm$ 0.27 i   |
| % S1             |    | 0.2%                           | 14.9%                            | 39.0%                           | 3.7%                             | 0.2%                 | 42.0%                           | -                  | -                  | -                  | -                  | 100%                |
| % S6             |    | 0.9%                           | 24.2%                            | 36.0%                           | 5.6%                             | 0.4%                 | 32.9%                           | 30.2%              | 0.8%               | 67.0%              | 2.0%               | 100%                |
| 'Florianka'      | S1 | 1.25 $\pm$ 0.01 n              | 398.31 $\pm$ 15.65 cd            | 1929.26 $\pm$ 92.40 c           | 183.52 $\pm$ 1.29 b              | 2.04 $\pm$ 0.25 ghij | 422.79 $\pm$ 13.21 h            |                    |                    |                    |                    | 23.46 $\pm$ 1.38 c  |
|                  | S2 | 1.59 $\pm$ 0.07 mn             | 385.38 $\pm$ 12.31 d             | 1654.55 $\pm$ 69.67 d           | 185.08 $\pm$ 14.76 b             | 1.69 $\pm$ 0.23 ijkl | 326.03 $\pm$ 8.75 k             | 0.00               | 0.00               | 0.00               | 0.00               | 18.04 $\pm$ 3.05 ed |
|                  | S3 | 2.49 $\pm$ 0.11 l              | 405.53 $\pm$ 7.95 cd             | 1286.61 $\pm$ 3.11 e            | 205.23 $\pm$ 1.58 a              | 1.39 $\pm$ 0.01 klm  | 285.93 $\pm$ 3.11 l             |                    |                    |                    |                    | 19.96 $\pm$ 0.02 cd |

|      |           |               |                  |                   |                  |                 |                  |               |               |                |               |                 |
|------|-----------|---------------|------------------|-------------------|------------------|-----------------|------------------|---------------|---------------|----------------|---------------|-----------------|
|      | <b>S4</b> | 2.35 ± 0.04 l | 335.13 ± 21.87 e | 877.43 ± 88.08 g  | 157.15 ± 10.47 c | 1.14 ± 0.14 lmn | 182.91 ± 9.50 no |               |               |                |               | 18.34 ± 3.28 ed |
|      | <b>S5</b> | 1.70 ± 0.08 m | 123.20 ± 29.30 i | 308.66 ± 60.86 jk | 148.80 ± 3.77 c  | 0.70 ± 0.07 no  | 129.33 ± 2.87 p  |               |               |                |               | 12.51 ± 0.29 fg |
|      | <b>S6</b> | 0.78 ± 0.03 o | 122.80 ± 7.48 i  | 294.90 ± 14.39 jk | 87.17 ± 6.31 f   | 0.33 ± 0.05 o   | 47.00 ± 2.15 r   | 3.56 ± 0.08 c | 1.58 ± 0.16 c | 22.03 ± 0.36 c | 3.67 ± 0.62 b | 6.41 ± 0.90 hi  |
| % S1 |           | 0.0%          | 13.6%            | 65.7%             | 6.2%             | 0.1%            | 14.4%            | -             | -             | -              | -             | 100%            |
| % S6 |           | 0.1%          | 22.2%            | 53.3%             | 15.8%            | 0.1%            | 8.5%             | 11.5%         | 5.1%          | 71.4%          | 11.9%         | 100%            |

The results are expressed as mean ± standard deviation (SD), n = 3. Abbreviations: **S1-S6**. subsequent sampling stages; **% share S1**, **% share S6**, percentage of individual compound within a group at the stages S1 and S6, respectively; **dw**. dry weight; small letters stand as homogenous groups (Duncan's test); **Cy 3-gal**. cyanidin 3-O-galactoside; **Cy-3-rob**. cyanidin 3-O-robinobioside; **Pg-3-gal**. pelargonidin 3-O-galactoside; **Pg-3-rob**. pelargonidin 3-O-robinobioside; **Q-3-glucur**. quercetin 3-O-glucuronide;

**Table S5** HPLC-PDA quantification [mg/100 g dw] of the individual hydrolysable tannins and iridoids during the development and ripening of cornelian cherry fruit.

|                  |       | HYDROLYZABLE TANNINS |                |                    |                      |                     |                     | IRIDOIDS            |                    |                  |
|------------------|-------|----------------------|----------------|--------------------|----------------------|---------------------|---------------------|---------------------|--------------------|------------------|
|                  |       | Gallic acid          | Ellagic acid   | Gallotannins       | Camptothin A isomers | Cornusiin A isomers | Cornusiin F isomers | Cornusiin C isomers | Loganic acid       | Cornuside        |
| Cultivar         | Stage | mean ± SD            | mean ± SD      | mean ± SD          | mean ± SD            | mean ± SD           | mean ± SD           | mean ± SD           | mean ± SD          | mean ± SD        |
| 'Bolestraszycki' | S1    | 69.73 ± 0.90 c       | 3.51 ± 0.31 hi | 241.05 ± 3.44 c    | 477.55 ± 5.77 a      | 350.75 ± 3.18 a     | 212.70 ± 5.47 a     | 225.34 ± 2.21 a     | 1700.96 ± 12.06 h  | 357.48 ± 12.39 f |
|                  | S2    | 48.71 ± 0.49 de      | 6.20 ± 0.43 ef | 300.81 ± 16.62 b   | 384.88 ± 11.81 b     | 328.11 ± 11.91 b    | 201.20 ± 1.38 b     | 180.04 ± 1.00 b     | 1817.14 ± 4.75 f   | 292.20 ± 2.67 g  |
|                  | S3    | 42.91 ± 1.76 efg     | 3.85 ± 0.09 h  | 331.08 ± 2.19 a    | 199.92 ± 2.02 g      | 200.50 ± 13.12 f    | 99.64 ± 9.74 f      | 83.30 ± 4.81 g      | 1567.97 ± 28.50 i  | 149.24 ± 2.02 k  |
|                  | S4    | 36.43 ± 1.18 gh      | 1.28 ± 0.03 kl | 225.07 ± 11.19 d   | 93.21 ± 3.34 jk      | 64.76 ± 7.39 k      | 28.45 ± 2.69 ij     | 45.01 ± 2.66 lm     | 1153.62 ± 3.13 m   | 84.54 ± 4.64 m   |
|                  | S5    | 25.12 ± 3.57 j       | 1.32 ± 0.01 kl | 72.69 ± 5.85 m     | 89.56 ± 0.66 k       | 70.12 ± 0.08 k      | 25.87 ± 0.90 ijkl   | 42.14 ± 2.64 lm     | 1572.70 ± 61.05 i  | 115.81 ± 9.92 l  |
|                  | S6    | 5.80 ± 0.30 kl       | 2.10 ± 0.66 jk | 143.68 ± 1.64 g    | 54.13 ± 0.79 lm      | 24.05 ± 0.85 o      | 26.47 ± 0.91 ijk    | 38.45 ± 0.76 mn     | 900.83 ± 6.08 o    | 59.55 ± 0.06 n   |
| % S1             |       | 4.2%                 | 0.2%           | 14.5%              | 28.7%                | 21.1%               | 12.8%               | 13.6%               | 82.6%              | 17.4%            |
| % S6             |       | 1.8%                 | 0.7%           | 50.0%              | 17.3%                | 7.7%                | 8.5%                | 12.3%               | 93.1%              | 6.9%             |
| 'Słowianin'      | S1    | 49.19 ± 1.58 de      | 1.16 ± 0.28 kl | 125.99 ± 0.85 hi   | 334.78 ± 1.58 c      | 287.70 ± 2.62 c     | 147.51 ± 3.60 c     | 142.34 ± 3.05 c     | 1508.15 ± 51.90 j  | 481.69 ± 6.72 c  |
|                  | S2    | 48.97 ± 0.96 de      | 6.22 ± 0.73 f  | 87.27 ± 3.88 lm    | 299.36 ± 0.34 e      | 240.09 ± 4.08 d     | 112.47 ± 4.60 e     | 113.91 ± 2.09 e     | 1778.42 ± 38.62 fg | 504.08 ± 16.72 b |
|                  | S3    | 39.03 ± 0.85 fgh     | 6.04 ± 0.47 f  | 139.82 ± 14.17 gh  | 210.53 ± 4.44 g      | 156.97 ± 2.50 g     | 81.96 ± 0.56 g      | 72.83 ± 5.52 h      | 1728.25 ± 7.52 gh  | 383.91 ± 4.56 e  |
|                  | S4    | 28.41 ± 0.11 ij      | 4.77 ± 0.08 g  | 242.62 ± 5.34 c    | 139.75 ± 5.46 i      | 123.76 ± 1.33 i     | 52.22 ± 2.27 h      | 53.77 ± 3.10 j      | 1456.06 ± 12.39 j  | 236.36 ± 1.62 i  |
|                  | S5    | 26.12 ± 6.43 j       | 2.06 ± 0.43 jk | 101.98 ± 12.38 jkl | 62.78 ± 4.82 l       | 51.88 ± 8.37 l      | 19.89 ± 1.22 klm    | 22.79 ± 5.26 p      | 1148.16 ± 65.56 m  | 143.70 ± 14.99 k |
|                  | S6    | 0.00 ± 0.00 l        | 0.94 ± 0.01 l  | 106.84 ± 1.99 jk   | 44.40 ± 2.93 n       | 26.64 ± 2.82 mn     | 15.50 ± 0.43 m      | 22.88 ± 2.33 p      | 661.74 ± 4.70 q    | 59.41 ± 0.36 n   |
| % S1             |       | 4.1%                 | 0.1%           | 10.4%              | 27.7%                | 23.8%               | 12.2%               | 11.8%               | 75.8%              | 24.2%            |
| % S6             |       | 0.0%                 | 0.4%           | 45.7%              | 19.0%                | 11.4%               | 6.6%                | 9.8%                | 91.8%              | 8.2%             |
| 'Paczoski'       | S1    | 37.60 ± 4.60 gh      | 4.24 ± 1.04 gh | 20.43 ± 0.04 p     | 292.58 ± 0.19 e      | 250.17 ± 1.29 d     | 128.89 ± 0.40 d     | 132.72 ± 0.24 d     | 2295.61 ± 26.31 d  | 414.27 ± 5.45 d  |
|                  | S2    | 44.38 ± 0.48 ef      | 5.85 ± 0.26 e  | 37.95 ± 0.95 no    | 256.04 ± 1.16 f      | 226.99 ± 1.03 e     | 128.06 ± 2.09 d     | 115.85 ± 4.12 e     | 2708.85 ± 3.72 b   | 384.52 ± 0.36 e  |
|                  | S3    | 33.77 ± 5.67 hi      | 2.85 ± 0.04 ij | 47.76 ± 0.43 n     | 159.77 ± 1.81 h      | 136.37 ± 1.86 h     | 45.66 ± 1.15 h      | 64.42 ± 3.85 i      | 2839.38 ± 4.22 a   | 269.18 ± 1.81 h  |
|                  | S4    | 27.57 ± 0.01 ij      | 1.74 ± 0.01 kl | 42.26 ± 0.46 no    | 105.88 ± 0.07 j      | 103.41 ± 1.03 j     | 29.86 ± 0.59 i      | 46.52 ± 0.36 kl     | 2360.53 ± 0.61 c   | 175.43 ± 1.66 j  |
|                  | S5    | 29.92 ± 0.28 ij      | 1.63 ± 0.12 kl | 28.21 ± 1.43 op    | 67.16 ± 1.77 l       | 68.99 ± 4.05 k      | 21.76 ± 0.00 jklm   | 32.68 ± 3.08 no     | 1943.45 ± 4.56 e   | 130.30 ± 0.35 kl |
|                  | S6    | 3.53 ± 0.54 l        | 1.99 ± 0.38 jk | 27.91 ± 1.49 op    | 48.39 ± 7.06 n       | 23.60 ± 3.85 o      | 14.87 ± 3.82 m      | 25.68 ± 0.28 p      | 1056.73 ± 0.23 n   | 69.46 ± 15.26 mn |
| % S1             |       | 4.0%                 | 0.5%           | 2.1%               | 30.9%                | 26.4%               | 13.6%               | 14.0%               | 84.7%              | 15.3%            |
| % S6             |       | 0.0%                 | 1.0%           | 14.4%              | 24.9%                | 12.1%               | 7.7%                | 13.2%               | 93.8%              | 6.2%             |
| 'Florianka'      | S1    | 91.39 ± 0.91 a       | 9.33 ± 0.47 d  | 113.21 ± 2.97 ij   | 253.39 ± 15.86 d     | 143.02 ± 6.90 h     | 116.24 ± 0.95 e     | 59.05 ± 3.82 ij     | 1206.69 ± 12.31 m  | 552.25 ± 12.31 a |

|      |                |                |                  |                  |                 |                 |                 |                   |                  |
|------|----------------|----------------|------------------|------------------|-----------------|-----------------|-----------------|-------------------|------------------|
| S2   | 84.45 ± 5.32 b | 9.26 ± 0.43 d  | 194.64 ± 16.30 e | 258.98 ± 15.19 f | 158.81 ± 3.30 g | 113.59 ± 0.40 e | 91.50 ± 1.46 f  | 1307.26 ± 30.43 l | 472.83 ± 15.77 c |
| S3   | 80.48 ± 5.14 b | 31.62 ± 0.55 a | 289.34 ± 5.94 b  | 166.46 ± 2.85 h  | 75.00 ± 8.67 k  | 95.17 ± 2.27 f  | 53.01 ± 5.15 jk | 1392.98 ± 9.17 k  | 347.71 ± 2.76 f  |
| S4   | 54.28 ± 2.80 d | 12.73 ± 0.11 c | 290.19 ± 6.97 b  | 97.39 ± 3.87 jk  | 76.11 ± 8.53 k  | 52.28 ± 7.33 h  | 67.44 ± 3.73 i  | 1305.98 ± 12.43 l | 229.30 ± 18.51 i |
| S5   | 45.71 ± 4.80 e | 13.57 ± 0.29 b | 92.67 ± 11.91 kl | 22.06 ± 4.22 o   | 31.79 ± 6.18 mn | 7.58 ± 1.24 n   | 29.59 ± 3.54 op | 1151.50 ± 31.09 m | 57.87 ± 9.49 n   |
| S6   | 10.32 ± 0.54 k | 2.76 ± 0.04 ij | 162.82 ± 7.83 f  | 66.77 ± 2.16 l   | 37.42 ± 0.03 m  | 18.89 ± 0.89 lm | 46.63 ± 2.04 kl | 835.03 ± 19.74 p  | 75.14 ± 0.92 mn  |
| % S1 | <b>10.5%</b>   | <b>1.1%</b>    | <b>13.0%</b>     | <b>29.1%</b>     | <b>16.4%</b>    | <b>13.4%</b>    | <b>6.8%</b>     | <b>68.6%</b>      | <b>31.4%</b>     |
| % S6 | <b>2.7%</b>    | <b>0.7%</b>    | <b>43.3%</b>     | <b>17.8%</b>     | <b>9.9%</b>     | <b>5.0%</b>     | <b>12.4%</b>    | <b>91.7%</b>      | <b>8.3%</b>      |

The results are expressed as mean ± standard deviation (SD), n = 3. Abbreviations: **S1-S6**, subsequent sampling stages; % **S1**, % **S6**, percentage of individual compound within a group at the stages S1 and S6, respectively; **dw**, dry weight; small letters stand as homogenous groups (Duncan's test);

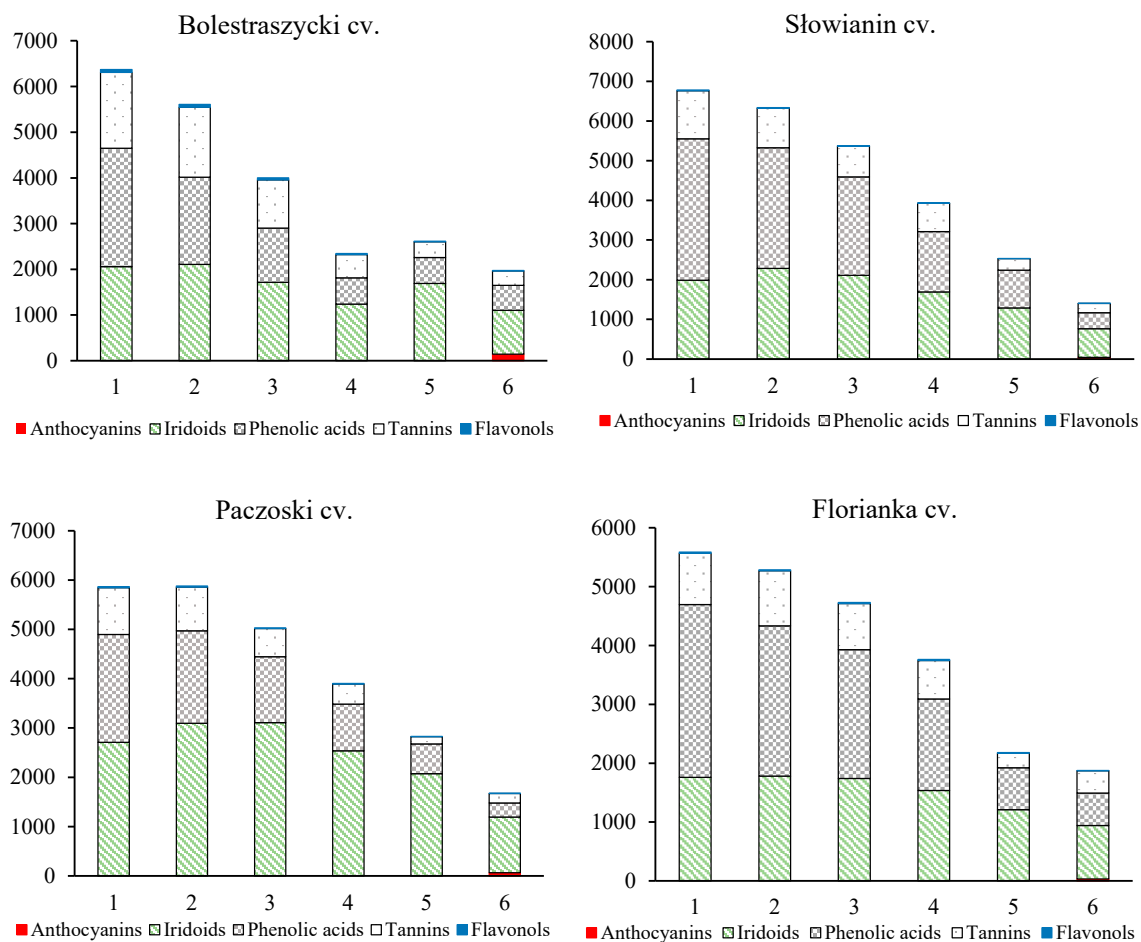

**Figure S1** Changes in the content (mg/100 g dw) all groups of analyzed secondary metabolites during the development and ripening of cornelian cherry. The numbers (1–6) on the horizontal axis represent studied stages. Small letters stand as homogenous groups (Duncan's test).
